# Supplementary material for: Progression in Time of Dentate Gyrus Granule Cell Layer Widening due to Excitotoxicity Occurs along In Vivo LTP Reinstatement and Contextual Fear Memory Recovery
Source: Hindawi journal article supplement (doi:10.1155/2022/7432842), 2022-09-27

**Septal****Temporal****Sham**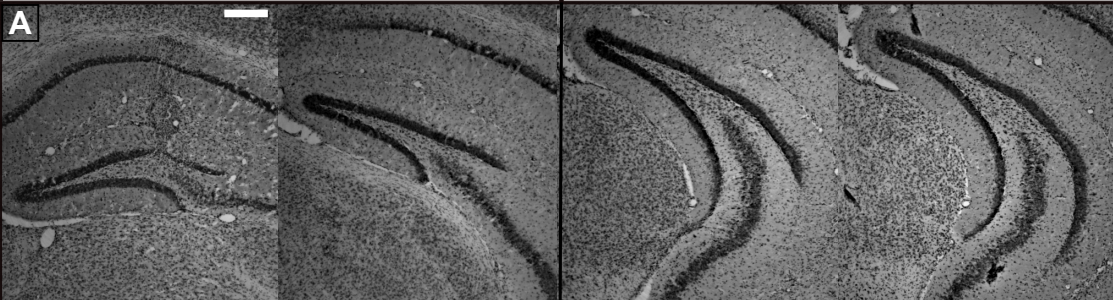**10 dpi**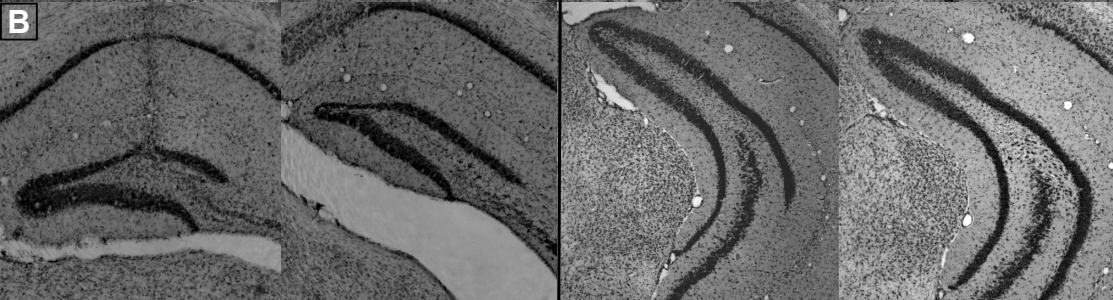**30 dpi**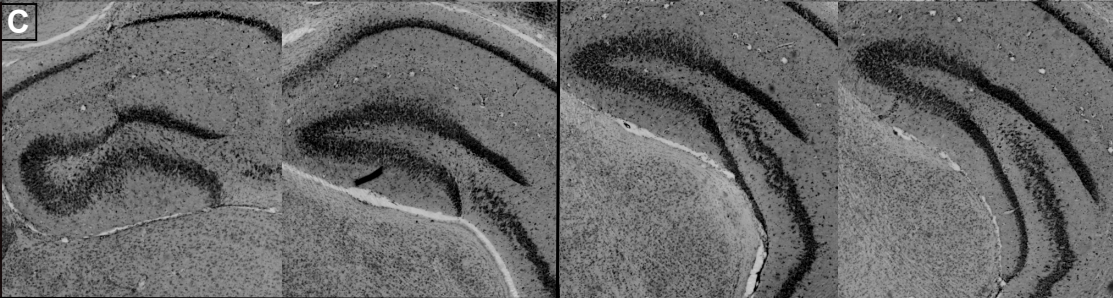

Supplement: f1 [file 7432842.f1.pdf]
