# Supplementary material for: Progression in Time of Dentate Gyrus Granule Cell Layer Widening due to Excitotoxicity Occurs along In Vivo LTP Reinstatement and Contextual Fear Memory Recovery
Source: Hindawi journal article supplement (doi:10.1155/2022/7432842), 2022-09-27

**Contralateral**

**Ipsilateral**

**10 dpi**

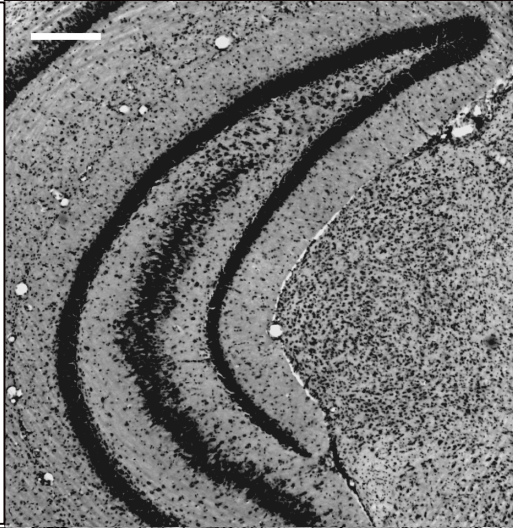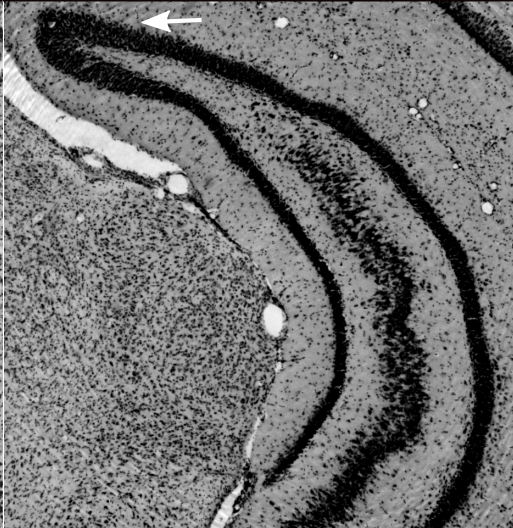

**30 dpi**

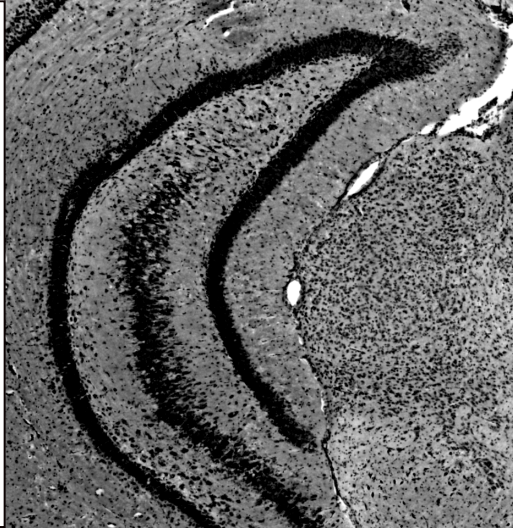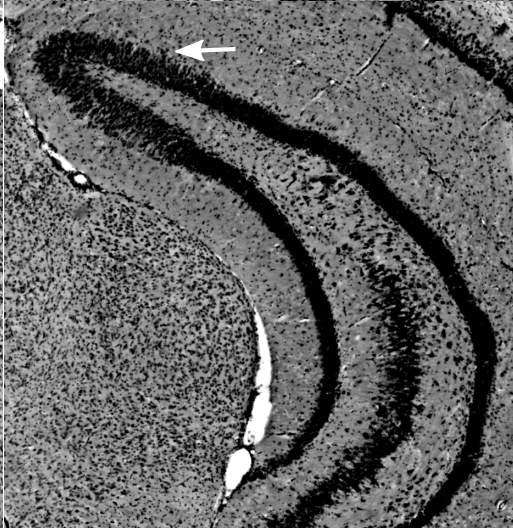

Supplement: f3 [file 7432842.f3.pdf]
