# Supplementary material for: Progression in Time of Dentate Gyrus Granule Cell Layer Widening due to Excitotoxicity Occurs along In Vivo LTP Reinstatement and Contextual Fear Memory Recovery
Source: Hindawi journal article supplement (doi:10.1155/2022/7432842), 2022-09-27

# Graphical Abstrac: Progression of DG structural alterations occur along functional recovery

## Focal KA injection

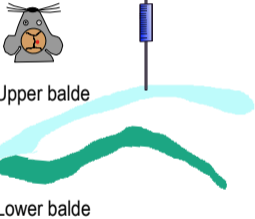

10 dpi

## KA-induced alterations

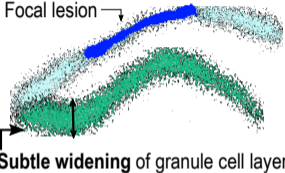

30 dpi

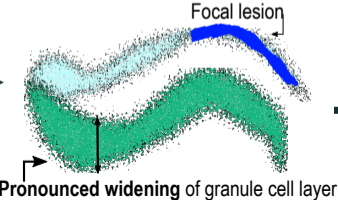

## LTP

Perforant pathway-DG

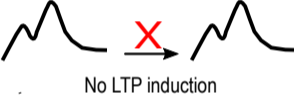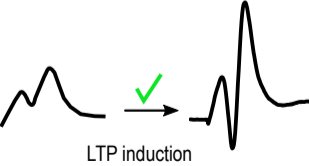

## Memory

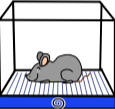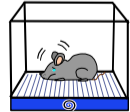

Supplement: f4 [file 7432842.f4.pdf]
